# Supplementary material
Source: MDPI journal article supplement (https://www.mdpi.com/2073-4352/5/4/608)
Supplement: s1 [file s1 › ww.cif]

 
data_ww 
 
_audit_creation_method            SHELXL-97 
_chemical_name_systematic 
; 
 ? 
; 
_chemical_name_common             ? 
_chemical_melting_point           ? 
_chemical_formula_moiety          ? 
_chemical_formula_sum 
 'C32 H34 Cu0 N4 O8 Zn' 
_chemical_formula_weight          668.00 
 
loop_ 
 _atom_type_symbol 
 _atom_type_description 
 _atom_type_scat_dispersion_real 
 _atom_type_scat_dispersion_imag 
 _atom_type_scat_source 
 'C'  'C'   0.0033   0.0016 
 'International Tables Vol C Tables 4.2.6.8 and 6.1.1.4' 
 'Cu'  'Cu'   0.3201   1.2651 
 'International Tables Vol C Tables 4.2.6.8 and 6.1.1.4' 
 'N'  'N'   0.0061   0.0033 
 'International Tables Vol C Tables 4.2.6.8 and 6.1.1.4' 
 'O'  'O'   0.0106   0.0060 
 'International Tables Vol C Tables 4.2.6.8 and 6.1.1.4' 
 'Zn'  'Zn'   0.2839   1.4301 
 'International Tables Vol C Tables 4.2.6.8 and 6.1.1.4' 
 'H'  'H'   0.0000   0.0000 
 'International Tables Vol C Tables 4.2.6.8 and 6.1.1.4' 
 
_symmetry_cell_setting            monoclinic 
_symmetry_space_group_name_H-M    P21 
 
loop_ 
 _symmetry_equiv_pos_as_xyz 
 'x, y, z' 
 '-x, y+1/2, -z' 
 
_cell_length_a                    11.421(2) 
_cell_length_b                    9.2213(17) 
_cell_length_c                    15.188(3) 
_cell_angle_alpha                 90.00 
_cell_angle_beta                  106.112(3) 
_cell_angle_gamma                 90.00 
_cell_volume                      1536.7(5) 
_cell_formula_units_Z             2 
_cell_measurement_temperature     293(2) 
_cell_measurement_reflns_used     ? 
_cell_measurement_theta_min       ? 
_cell_measurement_theta_max       ? 
 
_exptl_crystal_description        block 
_exptl_crystal_colour             colourless 
_exptl_crystal_size_max           0.32 
_exptl_crystal_size_mid           0.28 
_exptl_crystal_size_min           0.22 
_exptl_crystal_density_meas       ? 
_exptl_crystal_density_diffrn     1.444 
_exptl_crystal_density_method     'not measured' 
_exptl_crystal_F_000              696 
_exptl_absorpt_coefficient_mu     0.857 
_exptl_absorpt_correction_type    ? 
_exptl_absorpt_correction_T_min   ? 
_exptl_absorpt_correction_T_max   ? 
_exptl_absorpt_process_details    ? 
 
_exptl_special_details 
; 
 ? 
; 
 
_diffrn_ambient_temperature       293(2) 
_diffrn_radiation_wavelength      0.71073 
_diffrn_radiation_type            MoK\a 
_diffrn_radiation_source          'fine-focus sealed tube' 
_diffrn_radiation_monochromator   graphite 
_diffrn_measurement_device_type   'CCD area detector' 
_diffrn_measurement_method        'phi and omega scans'
_diffrn_detector_area_resol_mean  ? 
_diffrn_standards_number          ? 
_diffrn_standards_interval_count  ? 
_diffrn_standards_interval_time   ? 
_diffrn_standards_decay_%         ? 
_diffrn_reflns_number             8997 
_diffrn_reflns_av_R_equivalents   0.0362 
_diffrn_reflns_av_sigmaI/netI     0.0691 
_diffrn_reflns_limit_h_min        -15 
_diffrn_reflns_limit_h_max        13 
_diffrn_reflns_limit_k_min        -9 
_diffrn_reflns_limit_k_max        12 
_diffrn_reflns_limit_l_min        -18 
_diffrn_reflns_limit_l_max        20 
_diffrn_reflns_theta_min          1.86 
_diffrn_reflns_theta_max          28.26 
_reflns_number_total              5465 
_reflns_number_gt                 4217 
_reflns_threshold_expression      >2sigma(I) 
 
_computing_data_collection        ? 
_computing_cell_refinement        ? 
_computing_data_reduction         ? 
_computing_structure_solution     'SHELXS-97 (Sheldrick, 1990)' 
_computing_structure_refinement   'SHELXL-97 (Sheldrick, 1997)' 
_computing_molecular_graphics     ? 
_computing_publication_material   ? 
 
_refine_special_details 
; 
 Refinement of F^2^ against ALL reflections.  The weighted R-factor wR and 
 goodness of fit S are based on F^2^, conventional R-factors R are based 
 on F, with F set to zero for negative F^2^. The threshold expression of 
 F^2^ > 2sigma(F^2^) is used only for calculating R-factors(gt) etc. and is 
 not relevant to the choice of reflections for refinement.  R-factors based 
 on F^2^ are statistically about twice as large as those based on F, and R- 
 factors based on ALL data will be even larger. 
; 
 
_refine_ls_structure_factor_coef  Fsqd  
_refine_ls_matrix_type            full 
_refine_ls_weighting_scheme       calc  
_refine_ls_weighting_details 
 'calc w=1/[\s^2^(Fo^2^)+(0.0605P)^2^+0.0000P] where P=(Fo^2^+2Fc^2^)/3' 
_atom_sites_solution_primary      direct 
_atom_sites_solution_secondary    difmap 
_atom_sites_solution_hydrogens    geom 
_refine_ls_hydrogen_treatment     mixed 
_refine_ls_extinction_method      none 
_refine_ls_extinction_coef        ? 
_refine_ls_abs_structure_details 
 'Flack H D (1983), Acta Cryst. A39, 876-881' 
_refine_ls_abs_structure_Flack    0.026(16) 
_refine_ls_number_reflns          5465 
_refine_ls_number_parameters      411 
_refine_ls_number_restraints      1 
_refine_ls_R_factor_all           0.0711 
_refine_ls_R_factor_gt            0.0439 
_refine_ls_wR_factor_ref          0.1156 
_refine_ls_wR_factor_gt           0.1013 
_refine_ls_goodness_of_fit_ref    1.005 
_refine_ls_restrained_S_all       1.005 
_refine_ls_shift/su_max           0.000 
_refine_ls_shift/su_mean          0.000 
 
loop_ 
 _atom_site_label 
 _atom_site_type_symbol 
 _atom_site_fract_x 
 _atom_site_fract_y 
 _atom_site_fract_z 
 _atom_site_U_iso_or_equiv 
 _atom_site_adp_type 
 _atom_site_occupancy 
 _atom_site_symmetry_multiplicity 
 _atom_site_calc_flag 
 _atom_site_refinement_flags 
 _atom_site_disorder_assembly 
 _atom_site_disorder_group 
Zn1 Zn 0.01477(3) 0.91895(6) 0.09444(3) 0.03182(13) Uani 1 1 d . . . 
O1 O 0.0628(2) 0.9467(3) 0.23966(18) 0.0333(8) Uani 1 1 d . B . 
N1 N 0.0312(3) 0.7389(4) -0.2330(2) 0.0375(9) Uani 1 1 d . . . 
C1 C 0.3936(5) 1.0611(7) 0.4145(4) 0.0603(16) Uani 1 1 d . . . 
H1A H 0.3414 1.1354 0.4209 0.072 Uiso 1 1 calc R A 1 
O2 O 0.1633(3) 0.9264(6) -0.2211(3) 0.0675(10) Uani 1 1 d . . . 
N2 N 0.0373(3) 0.9034(5) 0.4455(2) 0.0355(8) Uani 1 1 d . B 1 
C2 C 0.4975(5) 1.0947(9) 0.3876(4) 0.0761(18) Uani 1 1 d . B 1 
H2A H 0.5122 1.1901 0.3739 0.091 Uiso 1 1 calc R B 1 
O3 O 0.1182(3) 0.7311(4) 0.3031(2) 0.0516(9) Uani 1 1 d . B 1 
N3 N 0.2017(2) 0.9208(6) 0.08757(19) 0.0332(7) Uani 1 1 d . . 1 
C3 C 0.5769(6) 0.9893(11) 0.3811(5) 0.076(2) Uani 1 1 d . B 1 
H3A H 0.6471 1.0127 0.3646 0.091 Uiso 1 1 calc R B 1 
O4 O 0.0368(3) 1.1313(4) 0.5004(3) 0.0561(9) Uani 1 1 d . B 1 
N4 N -0.1730(3) 0.9365(5) 0.0941(2) 0.0347(8) Uani 1 1 d . . 1 
C4 C 0.5544(6) 0.8494(10) 0.3987(5) 0.072(2) Uani 1 1 d . B 1 
H4A H 0.6096 0.7770 0.3951 0.087 Uiso 1 1 calc R B 1 
O5 O -0.0416(2) 0.8963(4) -0.04682(17) 0.0327(7) Uani 1 1 d . . 1 
C5 C 0.4478(5) 0.8146(8) 0.4222(4) 0.0604(15) Uani 1 1 d . B 1 
H5A H 0.4309 0.7181 0.4316 0.072 Uiso 1 1 calc R B 1 
O6 O 0.0162(3) 1.1592(3) 0.0674(2) 0.0348(6) Uani 1 1 d . . 1 
C6 C 0.3669(3) 0.9217(8) 0.4319(2) 0.0446(10) Uani 1 1 d . B 1 
O7 O 0.0212(3) 0.6962(4) 0.1241(3) 0.0463(8) Uani 1 1 d . . 1 
H7C H 0.0499 0.6840 0.1794 0.070 Uiso 1 1 calc R . 1 
H7L H 0.052(7) 0.655(9) 0.094(5) 0.09(3) Uiso 1 1 d . C 1 
C7 C 0.2576(4) 0.8834(6) 0.4649(3) 0.0428(12) Uani 1 1 d . B 1 
H7A H 0.2685 0.9252 0.5252 0.051 Uiso 1 1 calc R B 1 
H7B H 0.2545 0.7789 0.4711 0.051 Uiso 1 1 calc R B 1 
C8 C 0.1350(3) 0.9356(6) 0.4019(2) 0.0330(9) Uani 1 1 d . B 1 
H8A H 0.1390 1.0407 0.3939 0.040 Uiso 1 1 calc R B 1 
O8 O 0.2362(4) 0.1410(5) 0.6723(3) 0.0823(13) Uani 1 1 d . D 1 
H80A H 0.2376 0.0914 0.6170 0.099 Uiso 1 1 d R D 1 
H8B H 0.1944 0.0882 0.7032 0.099 Uiso 1 1 d R D 1 
C9 C -0.0003(4) 1.0051(5) 0.4935(3) 0.0362(10) Uani 1 1 d . B 1 
C10 C -0.0946(5) 0.9583(6) 0.5411(4) 0.0529(15) Uani 1 1 d . B 1 
H10A H -0.1155 1.0392 0.5736 0.079 Uiso 1 1 calc R B 1 
H10B H -0.0618 0.8816 0.5836 0.079 Uiso 1 1 calc R B 1 
H10C H -0.1663 0.9243 0.4963 0.079 Uiso 1 1 calc R B 1 
C11 C 0.1030(3) 0.8630(5) 0.3070(3) 0.0322(9) Uani 1 1 d . B 1 
C12 C -0.2918(4) 0.8405(5) -0.2329(3) 0.0382(10) Uani 1 1 d . E 1 
C13 C -0.3512(6) 0.9565(6) -0.2814(5) 0.0693(19) Uani 1 1 d . E 1 
H13A H -0.3186 1.0025 -0.3238 0.083 Uiso 1 1 calc R E 1 
C14 C -0.4594(6) 1.0060(8) -0.2682(5) 0.088(2) Uani 1 1 d . E 1 
H14A H -0.4986 1.0849 -0.3019 0.106 Uiso 1 1 calc R E 1 
C15 C -0.5096(5) 0.9412(8) -0.2064(4) 0.0638(16) Uani 1 1 d . E 1 
H15A H -0.5835 0.9735 -0.1992 0.077 Uiso 1 1 calc R E 1 
C16 C -0.4492(5) 0.8281(7) -0.1556(4) 0.0601(15) Uani 1 1 d . E 1 
H16A H -0.4810 0.7837 -0.1122 0.072 Uiso 1 1 calc R E 1 
C17 C -0.3410(4) 0.7801(6) -0.1687(3) 0.0519(12) Uani 1 1 d . E 1 
H17A H -0.3000 0.7041 -0.1329 0.062 Uiso 1 1 calc R E 1 
C18 C -0.1829(4) 0.7723(6) -0.2551(3) 0.0400(10) Uani 1 1 d . E 1 
H18A H -0.1888 0.7929 -0.3188 0.048 Uiso 1 1 calc R E 1 
H18B H -0.1891 0.6680 -0.2494 0.048 Uiso 1 1 calc R E 1 
C19 C -0.0570(4) 0.8182(5) -0.1981(3) 0.0329(9) Uani 1 1 d . E 1 
H19A H -0.0469 0.9224 -0.2063 0.039 Uiso 1 1 calc R E 1 
C20 C 0.1346(4) 0.8013(6) -0.2425(3) 0.0439(11) Uani 1 1 d . E 1 
C21 C 0.2093(4) 0.7039(7) -0.2845(4) 0.0595(15) Uani 1 1 d . E 1 
H21A H 0.2804 0.7550 -0.2893 0.089 Uiso 1 1 calc R E 1 
H21B H 0.1617 0.6746 -0.3444 0.089 Uiso 1 1 calc R E 1 
H21C H 0.2335 0.6197 -0.2466 0.089 Uiso 1 1 calc R E 1 
C22 C -0.0358(3) 0.7859(5) -0.0951(2) 0.0270(9) Uani 1 1 d . . 1 
C23 C -0.2527(4) 1.0290(6) 0.0418(3) 0.0417(11) Uani 1 1 d . . 1 
H23A H -0.2241 1.0955 0.0066 0.050 Uiso 1 1 calc R . 1 
C24 C -0.3755(4) 1.0312(6) 0.0372(3) 0.0420(11) Uani 1 1 d . . 1 
H24A H -0.4272 1.0991 0.0008 0.050 Uiso 1 1 calc R . 1 
C25 C -0.4208(3) 0.9303(7) 0.0880(2) 0.0345(9) Uani 1 1 d . . 1 
C26 C -0.3388(4) 0.8349(6) 0.1426(3) 0.0472(12) Uani 1 1 d . . 1 
H26A H -0.3649 0.7671 0.1783 0.057 Uiso 1 1 calc R . 1 
C27 C -0.2168(4) 0.8412(6) 0.1436(3) 0.0453(12) Uani 1 1 d . . 1 
H27A H -0.1629 0.7759 0.1805 0.054 Uiso 1 1 calc R . 1 
C28 C 0.2351(4) 0.9716(5) 0.0151(3) 0.0373(11) Uani 1 1 d . . 1 
H28A H 0.1747 1.0054 -0.0352 0.045 Uiso 1 1 calc R . 1 
C29 C 0.3550(4) 0.9763(5) 0.0117(3) 0.0383(10) Uani 1 1 d . . 1 
H29A H 0.3735 1.0124 -0.0400 0.046 Uiso 1 1 calc R . 1 
C30 C 0.4473(3) 0.9269(7) 0.0856(2) 0.0349(8) Uani 1 1 d . . 1 
C31 C 0.4117(4) 0.8697(6) 0.1591(3) 0.0465(13) Uani 1 1 d . . 1 
H31A H 0.4699 0.8322 0.2095 0.056 Uiso 1 1 calc R . 1 
C32 C 0.2906(4) 0.8689(6) 0.1570(3) 0.0447(13) Uani 1 1 d . . 1 
H32A H 0.2694 0.8298 0.2069 0.054 Uiso 1 1 calc R . 1 
 
loop_ 
 _atom_site_aniso_label 
 _atom_site_aniso_U_11 
 _atom_site_aniso_U_22 
 _atom_site_aniso_U_33 
 _atom_site_aniso_U_23 
 _atom_site_aniso_U_13 
 _atom_site_aniso_U_12 
Zn1 0.01975(17) 0.0415(3) 0.0371(2) 0.0016(3) 0.01264(14) -0.0005(2) 
O1 0.0338(13) 0.034(2) 0.0341(14) 0.0061(13) 0.0119(11) 0.0052(12) 
N1 0.0314(18) 0.045(2) 0.044(2) 0.0021(16) 0.0237(16) 0.0051(16) 
C1 0.044(3) 0.059(4) 0.075(4) 0.003(3) 0.012(3) -0.008(3) 
O2 0.0532(18) 0.056(2) 0.103(3) -0.012(3) 0.0378(18) -0.017(2) 
N2 0.0389(16) 0.034(2) 0.0393(16) -0.0034(18) 0.0207(13) -0.0007(18) 
C2 0.046(3) 0.090(5) 0.085(4) 0.018(4) 0.005(3) -0.015(3) 
O3 0.081(3) 0.0282(19) 0.0437(18) 0.0013(14) 0.0141(17) 0.0058(16) 
N3 0.0207(13) 0.0425(19) 0.0393(15) 0.004(2) 0.0134(11) 0.003(2) 
C3 0.049(4) 0.102(6) 0.078(4) -0.001(4) 0.019(3) -0.024(4) 
O4 0.073(2) 0.034(2) 0.075(2) -0.0080(16) 0.0441(19) -0.0010(16) 
N4 0.0240(13) 0.043(2) 0.0393(16) 0.0048(19) 0.0130(12) -0.0025(19) 
C4 0.046(3) 0.098(6) 0.075(4) -0.015(4) 0.019(3) 0.000(4) 
O5 0.0303(12) 0.032(2) 0.0358(13) -0.0024(14) 0.0098(10) 0.0019(12) 
C5 0.042(3) 0.072(4) 0.071(4) -0.010(3) 0.023(3) -0.003(3) 
O6 0.0367(16) 0.0294(17) 0.0421(16) -0.0006(13) 0.0173(12) -0.0032(13) 
C6 0.0382(19) 0.056(3) 0.0369(19) -0.003(3) 0.0058(15) -0.004(3) 
O7 0.057(2) 0.044(2) 0.0421(18) -0.0043(17) 0.0208(16) -0.0022(16) 
C7 0.039(2) 0.053(4) 0.038(2) 0.0040(19) 0.0139(17) -0.004(2) 
C8 0.0348(17) 0.032(3) 0.0360(18) 0.001(2) 0.0157(14) -0.003(2) 
O8 0.066(3) 0.091(4) 0.092(3) -0.005(3) 0.025(2) -0.025(2) 
C9 0.042(2) 0.031(3) 0.038(2) -0.0021(19) 0.0147(18) 0.0031(19) 
C10 0.055(3) 0.058(4) 0.058(3) -0.005(2) 0.035(2) 0.002(2) 
C11 0.0275(18) 0.036(3) 0.037(2) 0.0009(18) 0.0146(16) -0.0021(16) 
C12 0.031(2) 0.039(3) 0.044(2) 0.002(2) 0.0093(19) 0.0041(19) 
C13 0.063(3) 0.059(5) 0.099(4) 0.030(3) 0.045(3) 0.020(3) 
C14 0.074(4) 0.074(5) 0.123(6) 0.039(4) 0.037(4) 0.041(4) 
C15 0.046(3) 0.065(5) 0.086(4) -0.001(4) 0.028(3) 0.016(3) 
C16 0.053(3) 0.065(4) 0.075(4) 0.001(3) 0.039(3) 0.000(3) 
C17 0.047(3) 0.055(3) 0.058(3) 0.012(3) 0.023(2) 0.010(2) 
C18 0.033(2) 0.048(3) 0.040(2) 0.001(2) 0.0112(18) 0.005(2) 
C19 0.032(2) 0.029(2) 0.041(2) -0.0054(17) 0.0158(17) -0.0002(17) 
C20 0.035(2) 0.052(3) 0.050(3) -0.002(2) 0.0201(19) -0.005(2) 
C21 0.038(3) 0.081(4) 0.071(3) -0.005(3) 0.035(3) -0.001(3) 
C22 0.0144(16) 0.030(3) 0.039(2) -0.0023(18) 0.0110(15) -0.0013(14) 
C23 0.028(2) 0.049(3) 0.053(3) 0.012(2) 0.0201(19) -0.0002(19) 
C24 0.027(2) 0.052(3) 0.049(3) 0.011(2) 0.0147(19) 0.007(2) 
C25 0.0227(15) 0.043(2) 0.0405(19) 0.000(3) 0.0129(14) 0.000(2) 
C26 0.0236(19) 0.061(3) 0.065(3) 0.017(2) 0.025(2) 0.001(2) 
C27 0.0238(19) 0.057(3) 0.059(3) 0.013(2) 0.0176(19) 0.005(2) 
C28 0.0261(19) 0.047(3) 0.040(2) 0.0035(18) 0.0106(17) 0.0006(17) 
C29 0.031(2) 0.045(3) 0.042(2) 0.0060(18) 0.0148(18) 0.0011(17) 
C30 0.0191(14) 0.043(2) 0.0462(19) -0.001(3) 0.0151(14) -0.001(3) 
C31 0.0248(19) 0.076(4) 0.040(2) 0.007(2) 0.0106(17) 0.006(2) 
C32 0.031(2) 0.069(4) 0.039(2) 0.009(2) 0.0180(18) 0.002(2) 
 
_geom_special_details 
; 
 All esds (except the esd in the dihedral angle between two l.s. planes) 
 are estimated using the full covariance matrix.  The cell esds are taken 
 into account individually in the estimation of esds in distances, angles 
 and torsion angles; correlations between esds in cell parameters are only 
 used when they are defined by crystal symmetry.  An approximate (isotropic) 
 treatment of cell esds is used for estimating esds involving l.s. planes. 
; 
 
loop_ 
 _geom_bond_atom_site_label_1 
 _geom_bond_atom_site_label_2 
 _geom_bond_distance 
 _geom_bond_site_symmetry_2 
 _geom_bond_publ_flag 
Zn1 O5 2.072(3) . ? 
Zn1 O7 2.100(4) . ? 
Zn1 O1 2.135(3) . ? 
Zn1 N4 2.150(3) . ? 
Zn1 N3 2.166(3) . ? 
Zn1 O6 2.254(3) . ? 
O1 C11 1.262(5) . ? 
N1 C20 1.356(6) . ? 
N1 C19 1.458(5) . ? 
C1 C6 1.364(9) . ? 
C1 C2 1.393(8) . ? 
C1 H1A 0.9300 . ? 
O2 C20 1.219(7) . ? 
N2 C9 1.330(6) . ? 
N2 C8 1.477(5) . ? 
C2 C3 1.351(11) . ? 
C2 H2A 0.9300 . ? 
O3 C11 1.232(5) . ? 
N3 C32 1.333(5) . ? 
N3 C28 1.345(5) . ? 
C3 C4 1.356(10) . ? 
C3 H3A 0.9300 . ? 
O4 C9 1.233(6) . ? 
N4 C23 1.336(6) . ? 
N4 C27 1.340(6) . ? 
C4 C5 1.398(8) . ? 
C4 H4A 0.9300 . ? 
O5 C22 1.267(5) . ? 
C5 C6 1.388(8) . ? 
C5 H5A 0.9300 . ? 
O6 C22 1.241(5) 2 ? 
C6 C7 1.511(6) . ? 
O7 H7C 0.8200 . ? 
O7 H7L 0.75(8) . ? 
C7 C8 1.537(6) . ? 
C7 H7A 0.9700 . ? 
C7 H7B 0.9700 . ? 
C8 C11 1.538(6) . ? 
C8 H8A 0.9800 . ? 
O8 H80A 0.9600 . ? 
O8 H8B 0.9000 . ? 
C9 C10 1.517(6) . ? 
C10 H10A 0.9600 . ? 
C10 H10B 0.9600 . ? 
C10 H10C 0.9600 . ? 
C12 C13 1.368(7) . ? 
C12 C17 1.371(6) . ? 
C12 C18 1.514(6) . ? 
C13 C14 1.383(8) . ? 
C13 H13A 0.9300 . ? 
C14 C15 1.365(9) . ? 
C14 H14A 0.9300 . ? 
C15 C16 1.365(8) . ? 
C15 H15A 0.9300 . ? 
C16 C17 1.379(7) . ? 
C16 H16A 0.9300 . ? 
C17 H17A 0.9300 . ? 
C18 C19 1.518(6) . ? 
C18 H18A 0.9700 . ? 
C18 H18B 0.9700 . ? 
C19 C22 1.544(6) . ? 
C19 H19A 0.9800 . ? 
C20 C21 1.497(7) . ? 
C21 H21A 0.9600 . ? 
C21 H21B 0.9600 . ? 
C21 H21C 0.9600 . ? 
C22 O6 1.241(5) 2_545 ? 
C23 C24 1.386(5) . ? 
C23 H23A 0.9300 . ? 
C24 C25 1.395(7) . ? 
C24 H24A 0.9300 . ? 
C25 C26 1.381(7) . ? 
C25 C30 1.497(4) 1_455 ? 
C26 C27 1.389(6) . ? 
C26 H26A 0.9300 . ? 
C27 H27A 0.9300 . ? 
C28 C29 1.385(6) . ? 
C28 H28A 0.9300 . ? 
C29 C30 1.386(6) . ? 
C29 H29A 0.9300 . ? 
C30 C31 1.394(6) . ? 
C30 C25 1.497(4) 1_655 ? 
C31 C32 1.376(6) . ? 
C31 H31A 0.9300 . ? 
C32 H32A 0.9300 . ? 
 
loop_ 
 _geom_angle_atom_site_label_1 
 _geom_angle_atom_site_label_2 
 _geom_angle_atom_site_label_3 
 _geom_angle 
 _geom_angle_site_symmetry_1 
 _geom_angle_site_symmetry_3 
 _geom_angle_publ_flag 
O5 Zn1 O7 96.06(14) . . ? 
O5 Zn1 O1 176.76(11) . . ? 
O7 Zn1 O1 84.96(14) . . ? 
O5 Zn1 N4 88.98(11) . . ? 
O7 Zn1 N4 92.82(17) . . ? 
O1 Zn1 N4 87.89(11) . . ? 
O5 Zn1 N3 88.74(10) . . ? 
O7 Zn1 N3 92.39(17) . . ? 
O1 Zn1 N3 94.30(11) . . ? 
N4 Zn1 N3 174.5(2) . . ? 
O5 Zn1 O6 85.78(12) . . ? 
O7 Zn1 O6 177.40(15) . . ? 
O1 Zn1 O6 93.30(12) . . ? 
N4 Zn1 O6 89.04(15) . . ? 
N3 Zn1 O6 85.80(16) . . ? 
C11 O1 Zn1 134.0(3) . . ? 
C20 N1 C19 122.4(4) . . ? 
C6 C1 C2 121.4(6) . . ? 
C6 C1 H1A 119.3 . . ? 
C2 C1 H1A 119.3 . . ? 
C9 N2 C8 120.2(4) . . ? 
C3 C2 C1 120.3(7) . . ? 
C3 C2 H2A 119.8 . . ? 
C1 C2 H2A 119.8 . . ? 
C32 N3 C28 116.4(3) . . ? 
C32 N3 Zn1 120.2(3) . . ? 
C28 N3 Zn1 123.3(3) . . ? 
C2 C3 C4 120.2(7) . . ? 
C2 C3 H3A 119.9 . . ? 
C4 C3 H3A 119.9 . . ? 
C23 N4 C27 117.0(3) . . ? 
C23 N4 Zn1 124.3(3) . . ? 
C27 N4 Zn1 118.5(3) . . ? 
C3 C4 C5 119.6(7) . . ? 
C3 C4 H4A 120.2 . . ? 
C5 C4 H4A 120.2 . . ? 
C22 O5 Zn1 129.0(3) . . ? 
C6 C5 C4 121.1(7) . . ? 
C6 C5 H5A 119.5 . . ? 
C4 C5 H5A 119.5 . . ? 
C22 O6 Zn1 150.9(3) 2 . ? 
C1 C6 C5 117.3(5) . . ? 
C1 C6 C7 122.3(5) . . ? 
C5 C6 C7 120.3(6) . . ? 
Zn1 O7 H7C 109.5 . . ? 
Zn1 O7 H7L 111(6) . . ? 
H7C O7 H7L 115.7 . . ? 
C6 C7 C8 114.4(4) . . ? 
C6 C7 H7A 108.6 . . ? 
C8 C7 H7A 108.6 . . ? 
C6 C7 H7B 108.6 . . ? 
C8 C7 H7B 108.6 . . ? 
H7A C7 H7B 107.6 . . ? 
N2 C8 C7 109.2(3) . . ? 
N2 C8 C11 108.7(3) . . ? 
C7 C8 C11 112.7(4) . . ? 
N2 C8 H8A 108.7 . . ? 
C7 C8 H8A 108.7 . . ? 
C11 C8 H8A 108.7 . . ? 
H80A O8 H8B 109.7 . . ? 
O4 C9 N2 123.8(4) . . ? 
O4 C9 C10 120.1(4) . . ? 
N2 C9 C10 116.1(4) . . ? 
C9 C10 H10A 109.5 . . ? 
C9 C10 H10B 109.5 . . ? 
H10A C10 H10B 109.5 . . ? 
C9 C10 H10C 109.5 . . ? 
H10A C10 H10C 109.5 . . ? 
H10B C10 H10C 109.5 . . ? 
O3 C11 O1 126.1(4) . . ? 
O3 C11 C8 118.3(4) . . ? 
O1 C11 C8 115.6(4) . . ? 
C13 C12 C17 117.5(4) . . ? 
C13 C12 C18 121.3(4) . . ? 
C17 C12 C18 120.9(4) . . ? 
C12 C13 C14 120.6(5) . . ? 
C12 C13 H13A 119.7 . . ? 
C14 C13 H13A 119.7 . . ? 
C15 C14 C13 121.2(6) . . ? 
C15 C14 H14A 119.4 . . ? 
C13 C14 H14A 119.4 . . ? 
C14 C15 C16 118.7(5) . . ? 
C14 C15 H15A 120.7 . . ? 
C16 C15 H15A 120.7 . . ? 
C15 C16 C17 119.7(5) . . ? 
C15 C16 H16A 120.1 . . ? 
C17 C16 H16A 120.1 . . ? 
C12 C17 C16 122.2(5) . . ? 
C12 C17 H17A 118.9 . . ? 
C16 C17 H17A 118.9 . . ? 
C12 C18 C19 117.7(4) . . ? 
C12 C18 H18A 107.9 . . ? 
C19 C18 H18A 107.9 . . ? 
C12 C18 H18B 107.9 . . ? 
C19 C18 H18B 107.9 . . ? 
H18A C18 H18B 107.2 . . ? 
N1 C19 C18 107.1(3) . . ? 
N1 C19 C22 110.0(3) . . ? 
C18 C19 C22 112.4(3) . . ? 
N1 C19 H19A 109.1 . . ? 
C18 C19 H19A 109.1 . . ? 
C22 C19 H19A 109.1 . . ? 
O2 C20 N1 123.5(4) . . ? 
O2 C20 C21 122.5(4) . . ? 
N1 C20 C21 114.0(5) . . ? 
C20 C21 H21A 109.5 . . ? 
C20 C21 H21B 109.5 . . ? 
H21A C21 H21B 109.5 . . ? 
C20 C21 H21C 109.5 . . ? 
H21A C21 H21C 109.5 . . ? 
H21B C21 H21C 109.5 . . ? 
O6 C22 O5 126.4(4) 2_545 . ? 
O6 C22 C19 119.2(4) 2_545 . ? 
O5 C22 C19 114.4(4) . . ? 
N4 C23 C24 123.5(4) . . ? 
N4 C23 H23A 118.3 . . ? 
C24 C23 H23A 118.3 . . ? 
C23 C24 C25 119.2(4) . . ? 
C23 C24 H24A 120.4 . . ? 
C25 C24 H24A 120.4 . . ? 
C26 C25 C24 117.6(3) . . ? 
C26 C25 C30 120.8(4) . 1_455 ? 
C24 C25 C30 121.6(4) . 1_455 ? 
C25 C26 C27 119.4(4) . . ? 
C25 C26 H26A 120.3 . . ? 
C27 C26 H26A 120.3 . . ? 
N4 C27 C26 123.4(4) . . ? 
N4 C27 H27A 118.3 . . ? 
C26 C27 H27A 118.3 . . ? 
N3 C28 C29 123.3(4) . . ? 
N3 C28 H28A 118.3 . . ? 
C29 C28 H28A 118.3 . . ? 
C28 C29 C30 119.8(4) . . ? 
C28 C29 H29A 120.1 . . ? 
C30 C29 H29A 120.1 . . ? 
C29 C30 C31 116.6(3) . . ? 
C29 C30 C25 123.2(4) . 1_655 ? 
C31 C30 C25 120.2(3) . 1_655 ? 
C32 C31 C30 119.9(4) . . ? 
C32 C31 H31A 120.0 . . ? 
C30 C31 H31A 120.0 . . ? 
N3 C32 C31 123.9(4) . . ? 
N3 C32 H32A 118.1 . . ? 
C31 C32 H32A 118.1 . . ? 
 
loop_ 
 _geom_torsion_atom_site_label_1 
 _geom_torsion_atom_site_label_2 
 _geom_torsion_atom_site_label_3 
 _geom_torsion_atom_site_label_4 
 _geom_torsion 
 _geom_torsion_site_symmetry_1 
 _geom_torsion_site_symmetry_2 
 _geom_torsion_site_symmetry_3 
 _geom_torsion_site_symmetry_4 
 _geom_torsion_publ_flag 
O5 Zn1 O1 C11 123(2) . . . . ? 
O7 Zn1 O1 C11 14.2(3) . . . . ? 
N4 Zn1 O1 C11 107.2(4) . . . . ? 
N3 Zn1 O1 C11 -77.9(4) . . . . ? 
O6 Zn1 O1 C11 -163.9(3) . . . . ? 
C6 C1 C2 C3 -2.4(9) . . . . ? 
O5 Zn1 N3 C32 -149.4(4) . . . . ? 
O7 Zn1 N3 C32 -53.4(4) . . . . ? 
O1 Zn1 N3 C32 31.8(4) . . . . ? 
N4 Zn1 N3 C32 145.0(14) . . . . ? 
O6 Zn1 N3 C32 124.8(4) . . . . ? 
O5 Zn1 N3 C28 30.2(4) . . . . ? 
O7 Zn1 N3 C28 126.2(4) . . . . ? 
O1 Zn1 N3 C28 -148.7(4) . . . . ? 
N4 Zn1 N3 C28 -35.4(19) . . . . ? 
O6 Zn1 N3 C28 -55.7(4) . . . . ? 
C1 C2 C3 C4 1.7(11) . . . . ? 
O5 Zn1 N4 C23 -52.2(4) . . . . ? 
O7 Zn1 N4 C23 -148.3(4) . . . . ? 
O1 Zn1 N4 C23 126.9(4) . . . . ? 
N3 Zn1 N4 C23 13.3(19) . . . . ? 
O6 Zn1 N4 C23 33.6(4) . . . . ? 
O5 Zn1 N4 C27 122.0(4) . . . . ? 
O7 Zn1 N4 C27 26.0(4) . . . . ? 
O1 Zn1 N4 C27 -58.9(4) . . . . ? 
N3 Zn1 N4 C27 -172.4(15) . . . . ? 
O6 Zn1 N4 C27 -152.2(4) . . . . ? 
C2 C3 C4 C5 0.9(12) . . . . ? 
O7 Zn1 O5 C22 -18.6(3) . . . . ? 
O1 Zn1 O5 C22 -127(2) . . . . ? 
N4 Zn1 O5 C22 -111.3(3) . . . . ? 
N3 Zn1 O5 C22 73.7(3) . . . . ? 
O6 Zn1 O5 C22 159.6(3) . . . . ? 
C3 C4 C5 C6 -2.8(10) . . . . ? 
O5 Zn1 O6 C22 -177.3(5) . . . 2 ? 
O7 Zn1 O6 C22 -42(4) . . . 2 ? 
O1 Zn1 O6 C22 5.8(5) . . . 2 ? 
N4 Zn1 O6 C22 93.6(5) . . . 2 ? 
N3 Zn1 O6 C22 -88.3(5) . . . 2 ? 
C2 C1 C6 C5 0.5(7) . . . . ? 
C2 C1 C6 C7 177.5(5) . . . . ? 
C4 C5 C6 C1 2.1(8) . . . . ? 
C4 C5 C6 C7 -174.9(5) . . . . ? 
C1 C6 C7 C8 56.7(6) . . . . ? 
C5 C6 C7 C8 -126.4(5) . . . . ? 
C9 N2 C8 C7 96.4(5) . . . . ? 
C9 N2 C8 C11 -140.4(4) . . . . ? 
C6 C7 C8 N2 -175.0(4) . . . . ? 
C6 C7 C8 C11 64.2(6) . . . . ? 
C8 N2 C9 O4 4.4(7) . . . . ? 
C8 N2 C9 C10 -175.8(4) . . . . ? 
Zn1 O1 C11 O3 -5.1(6) . . . . ? 
Zn1 O1 C11 C8 175.0(2) . . . . ? 
N2 C8 C11 O3 -76.5(5) . . . . ? 
C7 C8 C11 O3 44.6(5) . . . . ? 
N2 C8 C11 O1 103.4(4) . . . . ? 
C7 C8 C11 O1 -135.5(4) . . . . ? 
C17 C12 C13 C14 -2.5(9) . . . . ? 
C18 C12 C13 C14 171.8(6) . . . . ? 
C12 C13 C14 C15 0.1(12) . . . . ? 
C13 C14 C15 C16 1.8(11) . . . . ? 
C14 C15 C16 C17 -1.3(10) . . . . ? 
C13 C12 C17 C16 3.0(8) . . . . ? 
C18 C12 C17 C16 -171.3(5) . . . . ? 
C15 C16 C17 C12 -1.1(9) . . . . ? 
C13 C12 C18 C19 97.4(6) . . . . ? 
C17 C12 C18 C19 -88.5(6) . . . . ? 
C20 N1 C19 C18 139.7(4) . . . . ? 
C20 N1 C19 C22 -97.9(5) . . . . ? 
C12 C18 C19 N1 -179.6(4) . . . . ? 
C12 C18 C19 C22 59.5(5) . . . . ? 
C19 N1 C20 O2 1.5(7) . . . . ? 
C19 N1 C20 C21 -176.7(4) . . . . ? 
Zn1 O5 C22 O6 14.9(5) . . . 2_545 ? 
Zn1 O5 C22 C19 -165.7(2) . . . . ? 
N1 C19 C22 O6 -43.7(5) . . . 2_545 ? 
C18 C19 C22 O6 75.5(4) . . . 2_545 ? 
N1 C19 C22 O5 136.8(3) . . . . ? 
C18 C19 C22 O5 -103.9(4) . . . . ? 
C27 N4 C23 C24 0.5(7) . . . . ? 
Zn1 N4 C23 C24 174.8(4) . . . . ? 
N4 C23 C24 C25 -1.4(8) . . . . ? 
C23 C24 C25 C26 1.7(7) . . . . ? 
C23 C24 C25 C30 -179.8(4) . . . 1_455 ? 
C24 C25 C26 C27 -1.1(7) . . . . ? 
C30 C25 C26 C27 -179.7(4) 1_455 . . . ? 
C23 N4 C27 C26 0.1(7) . . . . ? 
Zn1 N4 C27 C26 -174.6(4) . . . . ? 
C25 C26 C27 N4 0.3(8) . . . . ? 
C32 N3 C28 C29 -2.2(7) . . . . ? 
Zn1 N3 C28 C29 178.3(3) . . . . ? 
N3 C28 C29 C30 -0.1(7) . . . . ? 
C28 C29 C30 C31 2.2(8) . . . . ? 
C28 C29 C30 C25 -179.0(4) . . . 1_655 ? 
C29 C30 C31 C32 -2.1(8) . . . . ? 
C25 C30 C31 C32 179.1(5) 1_655 . . . ? 
C28 N3 C32 C31 2.3(8) . . . . ? 
Zn1 N3 C32 C31 -178.1(4) . . . . ? 
C30 C31 C32 N3 -0.2(8) . . . . ? 
 
_diffrn_measured_fraction_theta_max    0.962 
_diffrn_reflns_theta_full              28.26 
_diffrn_measured_fraction_theta_full   0.962 
_refine_diff_density_max    0.870 
_refine_diff_density_min   -0.880 
_refine_diff_density_rms    0.082 
 _chemical_absolute_configuration unk
